# Supplementary material for: Supraspinal-selective TRPV1 desensitization induced by intracerebroventricular treatment with resiniferatoxin
Source: PubMed Central journal article supplement (PMC5622082; doi:10.1038/s41598-017-12717-5), 2017-09-29
Supplement: 41598_2017_12717_MOESM1_ESM.pdf [file 41598_2017_12717_MOESM1_ESM.pdf]

## **Supplementary information**

### **Supraspinal-selective TRPV1 desensitization induced by intracerebroventricular treatment with resiniferatoxin**

**Akihiro Fukushima<sup>1,2</sup>, Kizuku Mamada<sup>1</sup>, Aki Jimura<sup>1</sup> and Hideki Ono<sup>1,2</sup> \***

*1 Laboratory of Clinical Pharmacy and Pharmacology, Faculty of Pharmacy, Musashino University, 1-1-20 Shinmachi, Nishitokyo-shi, Tokyo 202-8585, Japan*

*2 Research Institute of Pharmaceutical Sciences, Musashino University, 1-1-20 Shinmachi, Nishitokyo-shi, Tokyo 202-8585, Japan*

## **Supplemental Methods**

### **Spontaneous locomotor activity in a novel environment**

On the experimental day, mice were transferred to a room lit by a red dim light (70 lux) and allowed to acclimate to their environment for 60 min. The mice were then individually placed in a novel cage and subsequent spontaneous locomotor activity was measured using an ACTIMO-100 Infrared Beam Sensor System (Bio Research Center, Nagoya, Japan). Total activity counts in each 5-min block were automatically recorded for 60 min.

### **LC-MS/MS analysis of monoamines in the mouse brain**

Monoamine contents in mouse brain were analyzed by liquid chromatography coupled with tandem mass spectrometry (LC-MS/MS) according to the method described previously<sup>1</sup>. Briefly, mouse brains were homogenized in solution containing 0.05% Triton-X and 10 mM ammonium formate and centrifuged with ice-cold chloroform/methanol (2:1, v/v). 3,4-Dihydroxybenzylamine hydrobromide (Sigma, St Louis, MO) as an internal standard was added to the homogenate. Serotonin, noradrenaline and dopamine were extracted from the supernatant with a Monospin PBA column (GL Sciences, Tokyo, Japan). Samples were analyzed on a Shimadzu LC-MS/MS system (LCMS-8040; Kyoto, Japan) equipped with a COSMOSIL PBr column: 2.0 mm I.D. × 150 mm (Nakalai Tesque, Kyoto, Japan). All samples were tested in duplicate.

## **Supplemental Reference**

1. Fukushima, A., Sekiguchi, W., Mamada, K., Tohma, Y. & Ono, H. Serotonergic System Does Not Contribute to the Hypothermic Action of Acetaminophen. *Biol. Pharm. Bull.* **40**, 227–233 (2017).

### **Supplemental Figure legends**

**Figure S1. Mice i.c.v.-administered RTX show normal spontaneous activity and brain monoamine content.** (a) Spontaneous locomotor activity in a novel cage. Two-way repeated measures ANOVA demonstrated a significant main effect of time [ $F(11,198) = 70.888, P < 0.05$ ]. However, there was no significant main effect of treatment [ $F(1,18) = 0.140, P > 0.05$ ] or any interaction between these factors [ $F(11,198) = 1.545, P > 0.05$ ]. (b-d) Brain content of serotonin (b), noradrenaline (c) and dopamine (d). All data represent the mean ( $\pm$  SEM) from ten (a) and seven mice (b). The Mann-Whitney U-test was used for (b-d) ( $P \geq 0.05$ ).

### **Figure S2. Ineffectiveness of non-steroidal anti-inflammatory drugs in the RTX test.**

Time spent licking/biting in response to i.pl. injection of RTX (1 ng) during the first 10 minutes of the RTX test. Indomethacin (a) and diclofenac sodium salt (b) were i.p.-administered 20 minutes before the test. All data represent the mean  $\pm$  SEM. The number of mice in each group is shown in parentheses. The Mann-Whitney U-test was used ( $P \geq 0.05$ ).

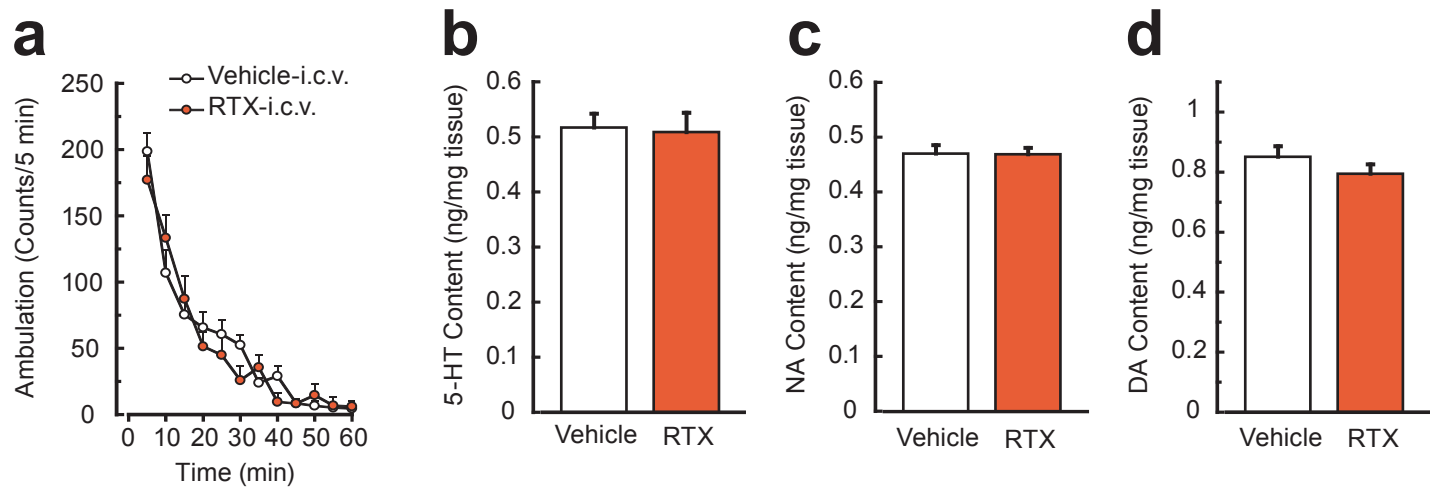

Figure S1

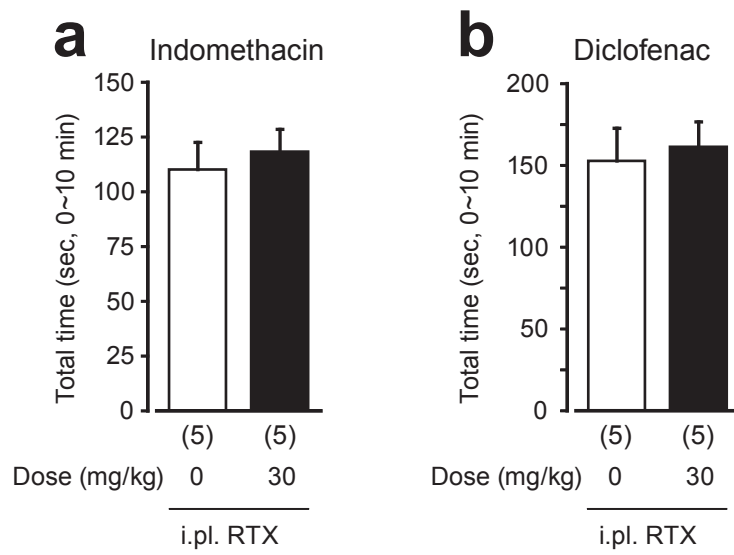

Figure S2
